# Supplementary material for: Eugenol Mediated Inhibition of Biofilm Formed by S. Aureus a Potent Organism for Pediatric Digestive System Diseases
Source: Research Square preprint supplement (doi:10.21203/rs.3.rs-645217/v1), 2021-06-28
Supplement: Supplementary file 1 [file f3bacd47ccd81eb1ac51167c.docx]

Table1 : List of Bioactive Compounds in ethanolic extract of Ocimum tenuiflorum (KT)

| **R/T (min)** | **Name of the Compound** | **Percentage Abundance** | **Molecular Formula** | **MW (g/mol)** | **3D Structure** |
| --- | --- | --- | --- | --- | --- |
| 4.4 | Eugenol | 0.31 | C10H12O2 | 164.2 | 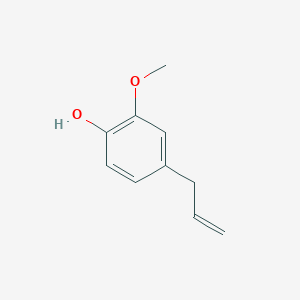 |
| 4.69 | Thymol | 13.67 | C10H14O | 150.22 | 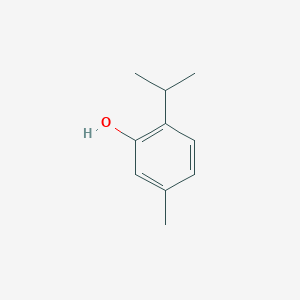 |
| 5.06 | Caffeic Acid | 12.83 | C9H8O4 | 180.16 | 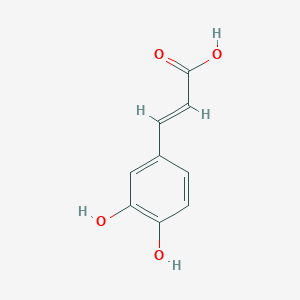 |
| 7 | Gallic Acid | 0.61 | C6H2(OH)3COOH | 170.12 | 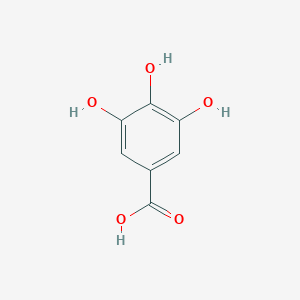 |
| 7.5 | Cinnamic Acid | 6.05 | C9H8O2 | 148.16 | 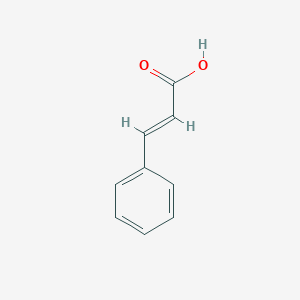 |
| 7.78 | *P*-Coumaric Acid | 7.7 | C9H8O3 | 164.16 | 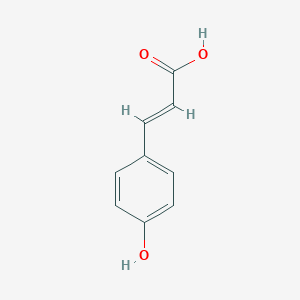 |
| 8.94 | Rosmarinic Acid | 2.07 | C18H16O8 | 360.3 | 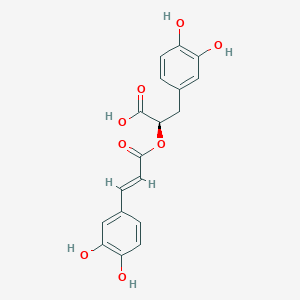 |
| 9.33 | Ursolic Acid | 7.4 | C30H48O3 | 456.7 | 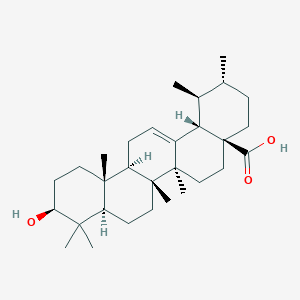 |
| 9.78 | Oleanolic Acid | 6.09 | C30H48O3 | 456.7 | 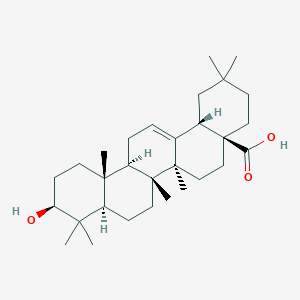 |
| 10.43 | Linalool | 20.48 | C10H18O | 154.25 | 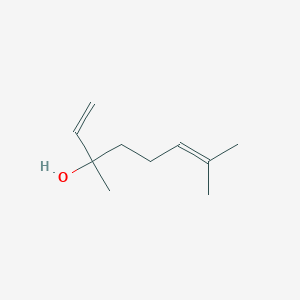 |
| 10.84 | β-Caryophyllene | 0.17 |  |  | 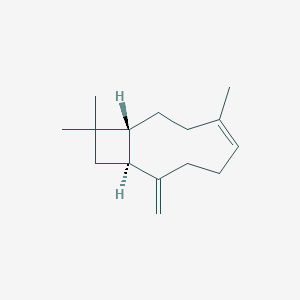 |
| 11.19 | Carvacrol | 1.49 | C10H14O | 150.22 | 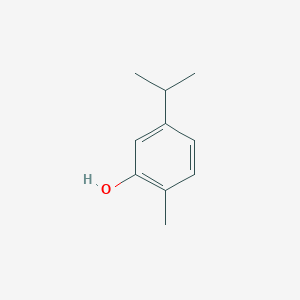 |
| 11.68 | Catechol | 11.22 | C6H6O2 | 110.11 | 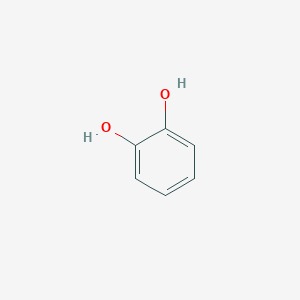 |
| 12.31 | Luteolin | 0.68 | C15H10O6 | 286.24 | 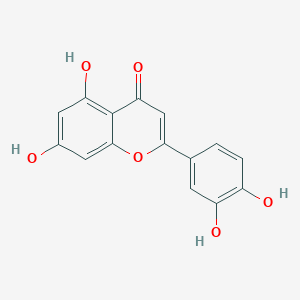 |
| 13.63 | Diosmetin | 0.05 | C16H12O6 | 300.26 | 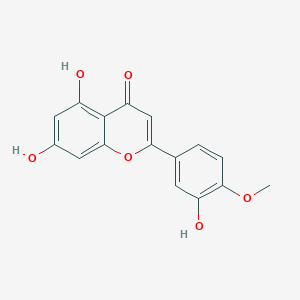 |
| 13.93 | Kaempferol | 0.43 | C15H10O6 | 286.24 | 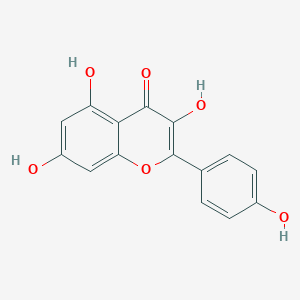 |
| 15.83 | Apigenin | 0.48 | C15H10O5 | 270.24 | 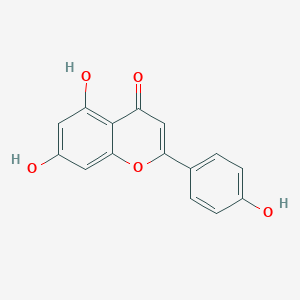 |
| 18.25 | Rosmarinic Acid | 0.34 | C18H16O8 | 360.3 | 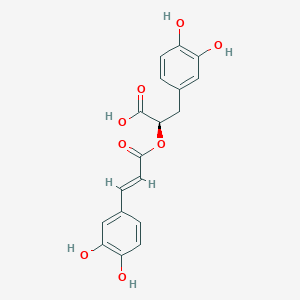 |
| 18.84 | Genistein | 1.39 | C15H10O5 | 270.24 | 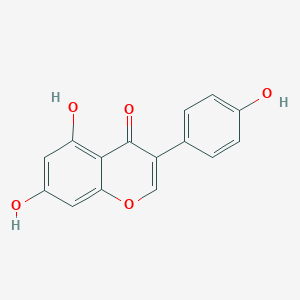 |
| 19.4 | Eucalyptol | 0.07 | C10H18O | 154.25 | 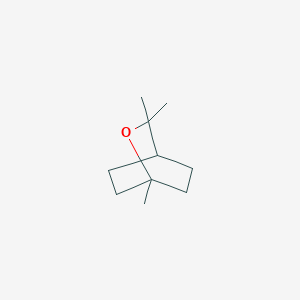 |

Table 2: Docking studies between the phytocompounds of KT and biofilm protein of *S. aureus* (3TIP)

| **BIOACTIVE COMPOUND** | **PHYTO-CHEMICALS** | **BIOFILM FORMING PROTEIN** | **AUTODOCK RESULTS** | **ENERGY VALUE (∆GO) Kcal/mol** |
| --- | --- | --- | --- | --- |
| ESSENTIAL OILS | EUGENOL | 3TIP *(Staphylococcus aureus)* | 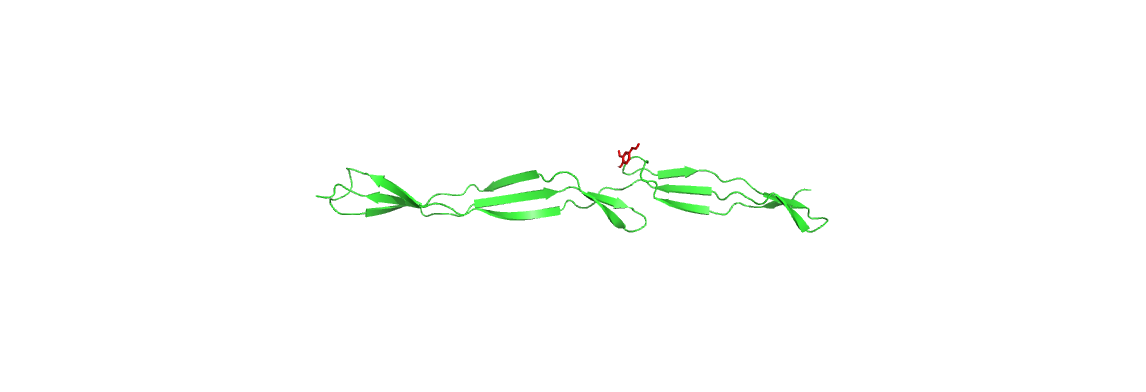 | -4.20 |
| THYMOL | 3TIP *(Staphylococcus aureus)* | 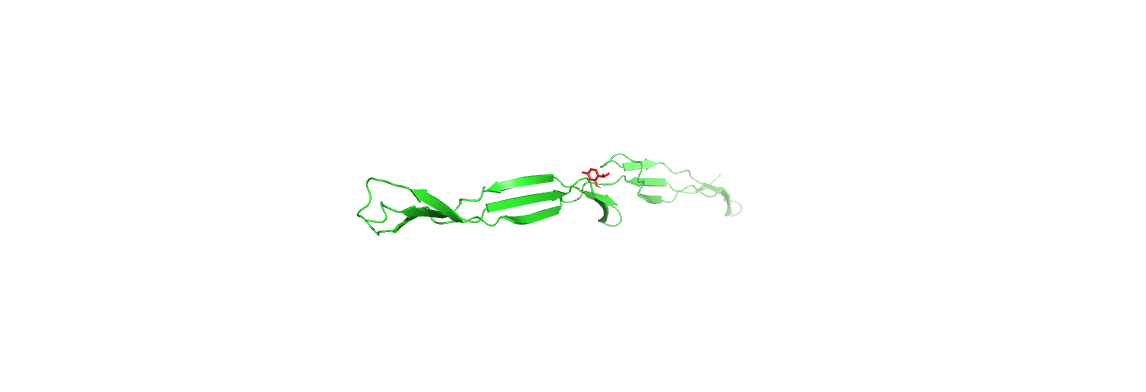 | -4.07 |
| TERPENOIDS | OLEANOLIC ACID | 3TIP *(Staphylococcus aureus)* | 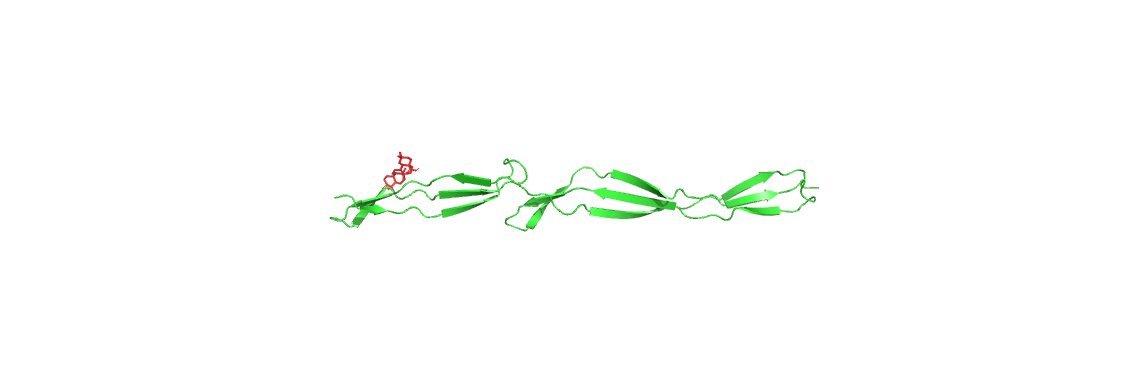 | -6.53 |
| URSOLIC ACID | 3TIP *(Staphylococcus aureus)* | 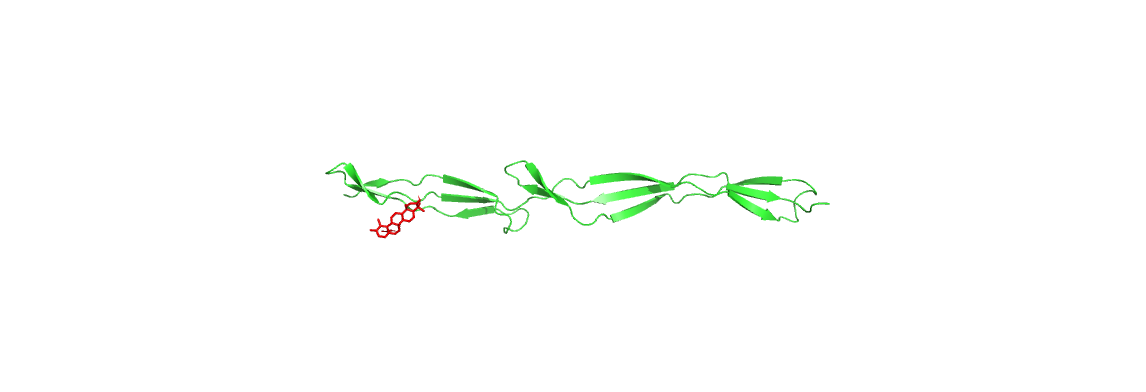 | -6.42 |
| LINALOOL | 3TIP *(Staphylococcus aureus)* | 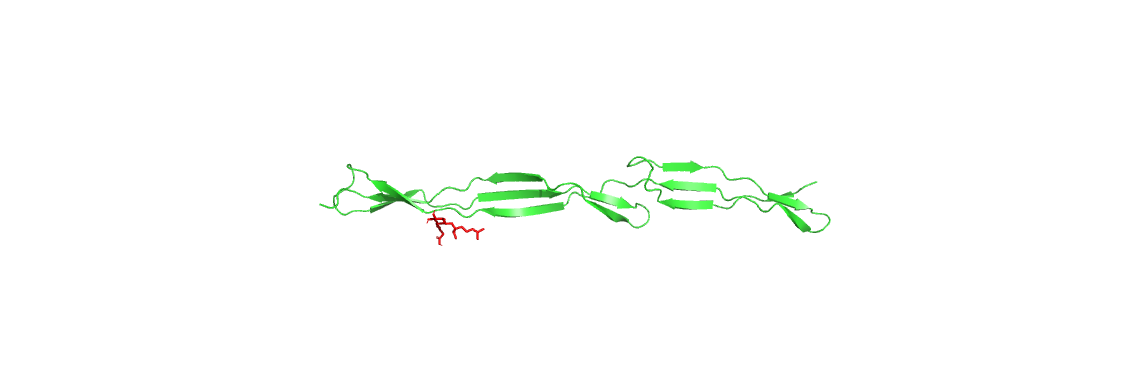 | -5.86 |
| β-CARYOPHYLLENE | 3TIP *(Staphylococcus aureus)* | 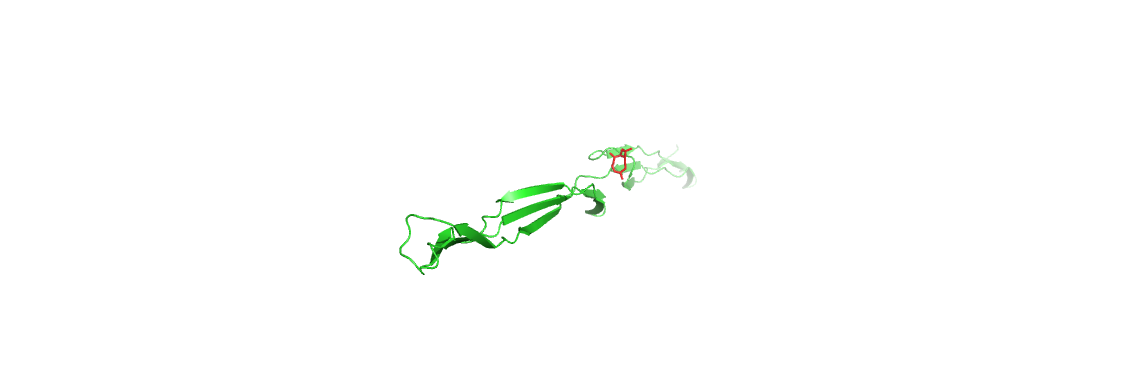 | -4.40 |
| CARVACROL | 3TIP *(Staphylococcus aureus)* | 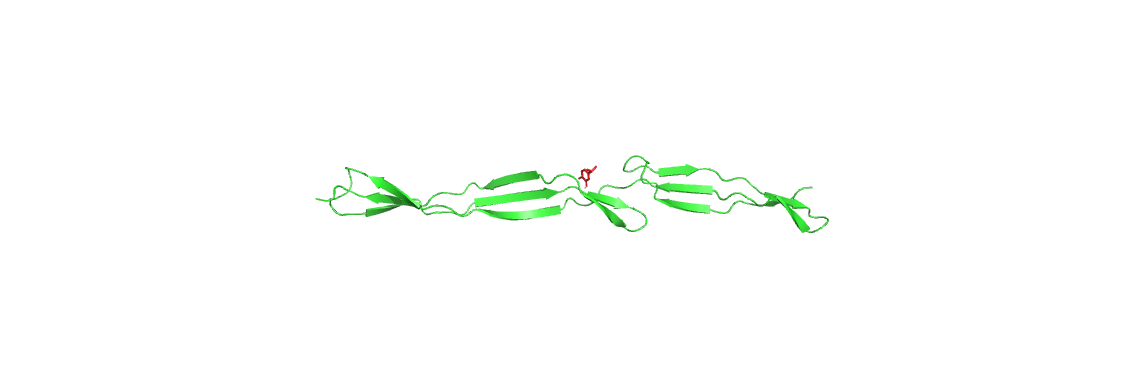 | -4.09 |
| OTHER PHENOLIC COMPOUNDS | ROSMARINIC ACID | 3TIP *(Staphylococcus aureus)* | 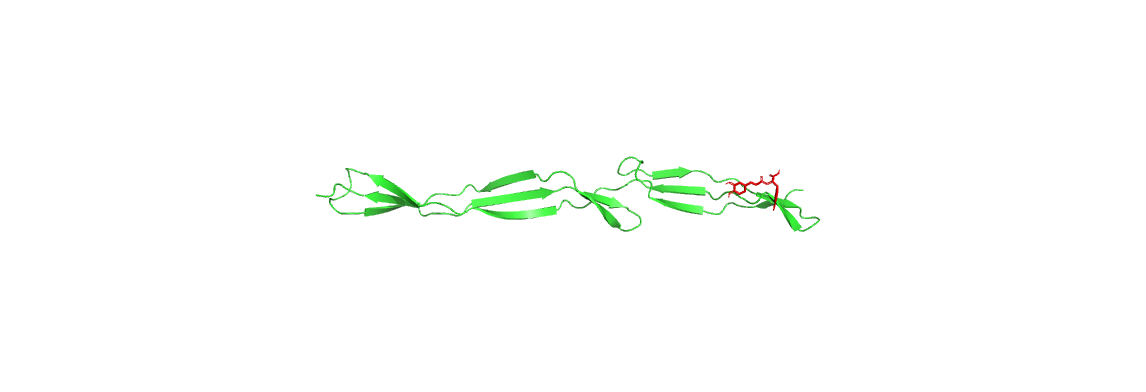 | -5.62 |

Table 3: LIGPLOT analysis depicting the major interacting amino acid residues

| **SL. NO.** | **BIOACTIVE COMPOUND** | **PHYTO-CHEMICAL** | **BIOFILM FORMING PROTEIN** | **LIGPLOT** |
| --- | --- | --- | --- | --- |
| **HYDROPHOBIC BOND** | **HYDROGEN**  **BOND** |
| 1. | ESSENTIAL OILS | EUGENOL | 3TIP (*Staphylococcus aureus*) | 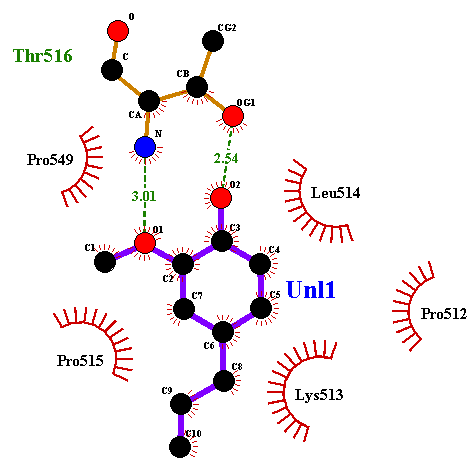 | LYS513 (3.95)  PRO549 (3.97) | THR516 (2.54)  THR516 (3.01) |
| THYMOL | 3TIP (*Staphylococcus aureus*) | 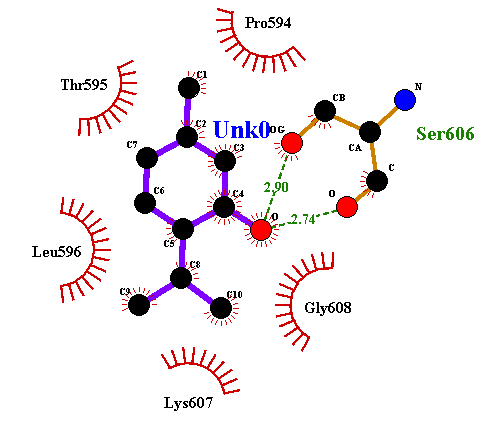 | PRO594 (3.41)  LEU596 (3.44) | LEU596 (2.74)  SER606 (2.90) |
| 2. | TERPENOIDS | OLEANOLIC ACID | 3TIP (*Staphylococcus aureus*) | 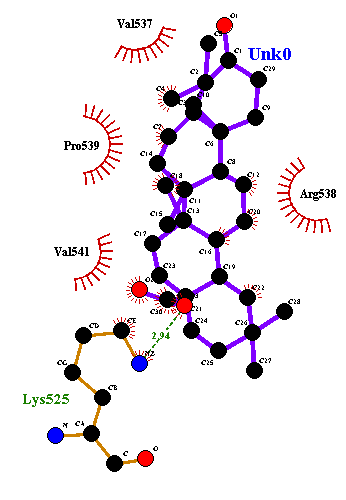 | ARG538 (3.23) | LYS525 (2.88) |
| URSOLIC ACID | 3TIP (*Staphylococcus aureus*) | 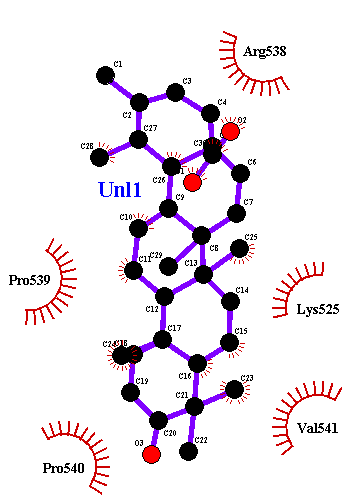 | ARG538 (3.03)  VAL541 (3.37) | - |
| LINALOOL | 3TIP (*Staphylococcus aureus*) | 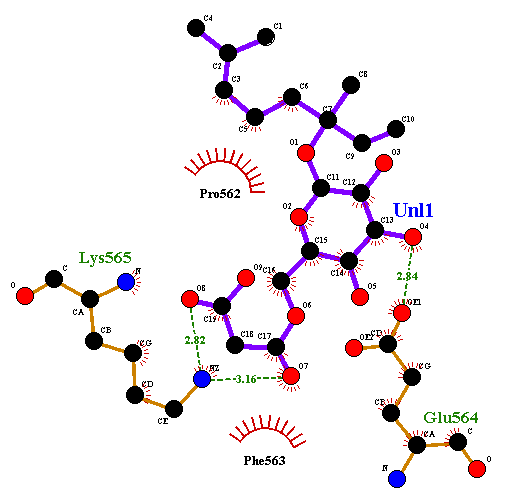 | PRO562 (3.40) | GLU564 (2.84)  GLU564 (2.84)  LYS565 (3.23) |
| Β-CARYOPHYLLENE | 3TIP (*Staphylococcus aureus*) | 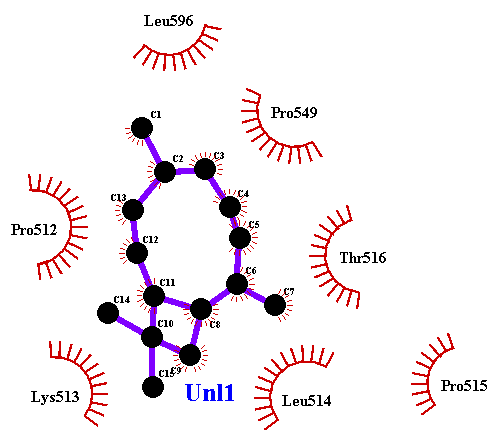 | PRO549 (3.17)  LEU596 (3.50) | - |
| CARVACROL | 3TIP (*Staphylococcus aureus*) | 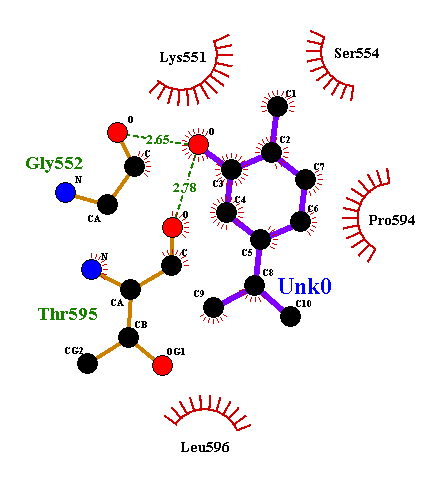 | LYS551 (387)  PRO594 (3.62)  LEU596 (3.87)  LEU596 (3.88) | GLY552 (2.72)  GLY (2.03)  THR (2.46) |
| 3. | OTHER PHENOLIC COMPOUNDS | ROSMARINIC ACID | 3TIP (*Staphylococcus aureus*) | 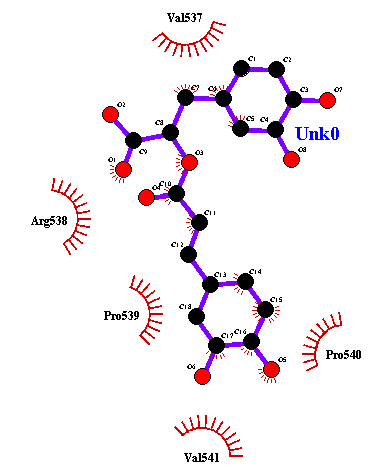 | ARG538 (3.75)  PRO539 (3.34)  VAL541 (3.97) | - |

Table 4: CABS-FLEX analysis showing the major alterations in the interacting residues in presence of phytocompounds

| **SL. NO.** | **BIOACTIVE COMPOUNDS** | **PHYTOCHEMICAL** | **BIOFILM FORMING PROTEIN** | **ROOT MEAN SQUARE FUNCTION** |
| --- | --- | --- | --- | --- |
| 1. | ESSENTIAL OILS | EUGENOL | 3TIP *(Staphylococcus aureus)* |  |
| THYMOL | 3TIP *(Staphylococcus aureus)* |  |
|  |  |
|  |  |
| 2. | TERPENOIDS | OLEANOLIC ACID | 3TIP *(Staphylococcus aureus)* |  |
|  |  |
|  |  |
| URSOLIC ACID | 3TIP *(Staphylococcus aureus)* |  |
| LINALOOL | 3TIP *(Staphylococcus aureus)* |  |
| β-CARYOPHYLLENE | 3TIP *(Staphylococcus aureus)* |  |
| CARVACROL | 3TIP *(Staphylococcus aureus)* |  |
| 3. | OTHER PHENOLIC COMPOUNDS | ROSMARINIC ACID | 3TIP *(Staphylococcus aureus)* |  |
